**A-927 Room B, 10/16/2000 2:00 PM - 4:00 PM (PS)**  
**Morphine-Induced Adenosine Release Is Reduced from Spinal Cord in Neuropathic Rats** *A. Sandner-Kiesling, M.D.; X.H. Li, M.D.; J.C. Eisenach, M.D., Anesth. Dept., Wake Forest Univ. Sch. of Med., Winston-Salem, NC, United States.* Morphine-incubated spinal synaptosomes release less adenosine in spinal nerve ligated rats than normal rats, perhaps explaining the reduced efficacy of opioids in neuropathic pain.

**A-928 Room B, 10/16/2000 2:00 PM - 4:00 PM (PS)**  
**The Capsaicin Receptor Variant, Stretch-inactivated Channel, Is Expressed in Small-Diameter Sensory Neurons** *Mark A. Schumacher, M.D., Ph.D.; Beverly E. Jong, B.A.; Sharon L. Frey, B.A.; Norman F. Capra, Ph.D.; Jon D. Levine, M.D., Ph.D., Anesthesia and Perioperative Care, University of California, San Francisco, San Francisco, CA, United States.* We have identified the capsaicin receptor variant SIC in sensory neurons.

**A-929 Room B, 10/16/2000 2:00 PM - 4:00 PM (PS)**  
**Lack of Effects of Intrathecal Administration of NMDA Receptor Antagonist in Thermal Hyperalgesia Induced by Injection of Low Concentration of Formalin** *Rika Sekine, MD; Mikito Kawamata, MD, PhD; Keiichi Omote, MD, PhD; Akiyoshi Namiki, MD, PhD, Anesthesiology, Sapporo Medical University, Sapporo, Hokkaido, Japan.* NMDA receptors are not involved in thermal hyperalgesia induced by low concentration formalin.

**A-930 Room B, 10/16/2000 2:00 PM - 4:00 PM (PS)**  
**Long Term Sensitization to Nociceptive Inputs Induced by Carrageenan in the Rat. Potentiation by Fentanyl** *Guy Simonnet, PhD; Cyril Rivat, BS; Jean-Benoit Corcuff, MD, PhD; Laure Pain, MD, PhD; Jean-Paul Laulin, PhD, U 259, INSERM, Bordeaux, France.* Carrageenan injection induced a long-lasting pain sensitization for several days. Fentanyl strongly potentiated carrageenan-induced hyperalgesia.

**A-931 Room B, 10/16/2000 2:00 PM - 4:00 PM (PS)**  
**Effect of CO<sub>2</sub> Inhibitor (Etodolac) on Neuropathic Pain in a Rat Model** *Hidemichi Suyama, M.D.; Syafruddin Gaus; Katsuyuki Moriwaki, M.D., PhD; Masashi Kawamoto, M.D., PhD; Osafumi Yuge, M.D., PhD, Anesthesiology and Critical Care Medicine, Hiroshima University School of Medicine, Hiroshima, Hiroshima, Japan.* Etodolac alleviated heat-evoked hyperalgesia in rats with CCI.

**A-932 Room B, 10/16/2000 2:00 PM - 4:00 PM (PS)**  
**Adenosine A1 but Not A2a Agonists Inhibit Pain Behaviors in a Rat Model for Postoperative Pain** *Peter K. Zahn, M.D.; Hugo Van Aken, M.D., Anesthesia, University of Muenster, Muenster, Germany.* Adenosine A1 but not A2a receptor agonists produce a marked decrease in pain behavior after incision. Spinal A1 receptor agonists may be useful for treating postoperative pain.

### Local Anesthesia: Pain - Clinical & Basic Science

**A-933 Room A, 10/17/2000 2:00 PM - 4:00 PM (PS)**  
**The Effect of Needle Gauge on the Cephalad Spread of Epidural Steroid Injection** *William E. Ackerman, MD; Mahmood Ahmad, MD; Mubammad A. Munir, MD; Jun-Ming Zhang, MS, MD, Pain Medicine, Integrative Pain Medicine of Arkansas, Little Rock, AR, United States.* Smaller gauge epidural Tuohy needles result in less cephalad spread of epidural steroid injection in prone position.

**A-934 Room A, 10/17/2000 2:00 PM - 4:00 PM (PS)**  
**A Lack of Efficacy of Betamethasone in Managing Postoperative Pain and Nausea in Gynecological Laparoscopic Surgery Patients** *Warren P. Bagley, MD; Audie A. Smith, MD; Carolyn C. Snider, MT; Roger C. Carroll, PhD, Anesthesiology, University of Tennessee, Graduate School of Medicine, Knoxville, TN, United States*

**A-935 Room A, 10/17/2000 2:00 PM - 4:00 PM (PS)**  
**The Safety and Efficacy of Intrathecal Morphine for Acute Postoperative Pain** *Monique M. Braeckman, BSc; Nicole Taviaux, RN; Jean G. Boogaerts, MD, PhD, Anesthesiology, CHU, Charleroi, Belgium.* This 2-yr survey show that intrathecal opioids provide satisfactory postoperative analgesia during the first 24 hours, associated with few side effects.

**A-936 Room A, 10/17/2000 2:00 PM - 4:00 PM (PS)**  
**Lower Incidence of Nausea with Morphine Compared to Piritramide Based Intravenous Patient-Controlled Analgesia (PCA)** *C. Breitfeld, M.D.; M. Eikermann, M.D.; T. Vockel; J. Peters, M.D. Ph.D., Abteilung f. Anasthesiologie u. Intensivmedizin, Universitat Essen, Essen, Germany.* Incidence and intensity of nausea are significantly lower during morphine compared to piritramide PCA.

**A-937 Room A, 10/17/2000 2:00 PM - 4:00 PM (PS)**  
**Epiduroscopic Analysis of Persistent Back and Leg Pain and the Efficacy of Epiduroscopy in the Treatment of Failed Back Pain Syndrome** *Young K. Choi, M.D.; Martin H. Tan, M.D.; Joseph D. Barbella, D.O.; William R. Grubb, D.D.S., M.D., Anesthesiology, Robert Wood Johnson Medical School, New Brunswick, NJ, United States.* Chronic back and leg pain with epiduritis was diagnosed and improved by epiduroscopy.

**A-938 Room A, 10/17/2000 2:00 PM - 4:00 PM (PS)**  
**Short- and Long-Term Analgesic Effect of Intraoperative Intravenous or Epidural Ketamine Administration** *Marc F. De Kock, MD, PhD; Philippe E. Dubois, MD; Bernard Vanderick, MD; Patricia M. Lavand'homme, MD, PhD, Anesthesiology, Cli. Univ. St Luc, Brussels, Belgium.* Epidural or IV ketamine has no major effect on early postoperative pain. In contrast, IV ketamine reduced residual pain at 1 month.

**A-939 Room A, 10/17/2000 2:00 PM - 4:00 PM (PS)**  
**Intravenous and Brachial Plexus Administration of Bupivacaine Loaded-Microspheres Lack Systemic Toxicity in Sheep Model** *Jean-Pierre C. Estebe, MD; Pascal Le Corre, PharmD-PhD; Laure Du Plessis, PharmD; Roger Le Verge, PharmD-PhD; Claude Ecoffey, MD, Dept Anesth 2, University of Rennes, France.* Bupivacaine (750, 300 mg) could be toxic in regional anesthesia; not if it was loaded into microspheres

**A-940 Room A, 10/17/2000 2:00 PM - 4:00 PM (PS)**  
**Probability of Definite Stellate Ganglion Block (SGB) at the 7th Cervical Vertebral Level (C7)** *Kiyoshi Harano, MD; Mitsubishi Takasaki, MD; Kazukuni Araki, MD; Yoshio Taniguchi, MD, Anesthesiology, Saga Medical School, Nabeshima, Saga, Japan.* There is no difference in the effect of SGB between performed at the C6 and C7 level. SGB at C6 or C7 may not provide the exact blockade of SG itself.
